# Supplementary material for: A state-of-the-science review and guide for measuring environmental exposure biomarkers in dried blood spots
Source: Springer Nature journal article supplement (doi:10.1038/s41370-022-00460-7), 2022-08-13
Supplement: MOESM2 [file 41370_2022_460_MOESM2_ESM.pdf]

Corresponding Author name: \_\_\_\_\_

Manuscript Number: \_\_\_\_\_

### Reporting Checklist

This checklist is used to ensure the quality, transparency, and reproducibility of published results. We require authors attest that these components have been considered and addressed.

| Exposure Assessment Guiding Principle                                                                                                              | Yes/No/Not Applicable |
|----------------------------------------------------------------------------------------------------------------------------------------------------|-----------------------|
| Has the method to estimate exposure been described clearly?                                                                                        |                       |
| Has the exposure assessment method been validated/evaluated as a proxy for exposure and is its validity or agreement with other methods described? |                       |
| Is the time period over which the exposure assessment method is considered to be a proxy for exposure appropriate for the research question?       |                       |
| If exposure is modeled or measured, were all critical potential routes and sources of exposure considered?                                         |                       |
| If exposure is modeled, how does it vary over space and time and are necessary historical data incorporated?                                       |                       |
| If biomarkers are used as indicators of exposure, could the biomarker measurement have been affected by the outcome (i.e., reverse causality)?     |                       |
| Are the strengths and weaknesses of the exposure approach detailed and discussed?                                                                  |                       |
